# Supplementary material for: Probing the magnetic relaxation and magnetic moment arrangement in a series of Dy4 squares
Source: Royal Society of Chemistry journal article supplement (doi:10.1039/c6dt04456e), 2016-12-26
Supplement: c6dt04456e1.pdf [file c6dt04456e1.pdf]

## Probing the Magnetic Relaxation and Magnetic Moments Arrangement in a Series of Dy<sub>4</sub> Squares

Jianfeng Wu, Shuang-Yan Lin, Si Shen, Xiao-Lei Li, Lang Zhao, Li Zhang and Jinkui Tang\*

Table S1. Crystallographic data for complexes **1-3**.

|                                                             | <b>1</b>                                                                         | <b>2</b>                                                                                      | <b>3</b>                                                                                      |
|-------------------------------------------------------------|----------------------------------------------------------------------------------|-----------------------------------------------------------------------------------------------|-----------------------------------------------------------------------------------------------|
| Formula                                                     | C <sub>98</sub> H <sub>149</sub> Dy <sub>8</sub> N <sub>11</sub> O <sub>56</sub> | C <sub>54</sub> H <sub>88</sub> Dy <sub>4</sub> N <sub>6</sub> O <sub>23</sub> S <sub>2</sub> | C <sub>52</sub> H <sub>68</sub> Dy <sub>4</sub> N <sub>6</sub> O <sub>23</sub> S <sub>2</sub> |
| FW, g·mol <sup>-1</sup>                                     | 3677.28                                                                          | 1903.42                                                                                       | 1859.24                                                                                       |
| crystal system                                              | Monoclinic                                                                       | Triclinic                                                                                     | Triclinic                                                                                     |
| space group                                                 | <i>C2/c</i>                                                                      | <i>P-1</i>                                                                                    | <i>P-1</i>                                                                                    |
| <i>T</i> , K                                                | 273(2)                                                                           | 296(2)                                                                                        | 273(2)                                                                                        |
| $\lambda$ , Å                                               | 0.71073                                                                          | 0.71073                                                                                       | 0.71073                                                                                       |
| <i>a</i> , Å                                                | 27.3361(9)                                                                       | 10.465(6)                                                                                     | 10.1501(6)                                                                                    |
| <i>b</i> , Å                                                | 26.2199(9)                                                                       | 13.832(7)                                                                                     | 12.5967(8)                                                                                    |
| <i>c</i> , Å                                                | 22.9128(8)                                                                       | 14.762(8)                                                                                     | 13.2679(8)                                                                                    |
| $\alpha$ , °                                                | 90                                                                               | 68.793(9)                                                                                     | 87.2500(10)                                                                                   |
| $\beta$ , °                                                 | 92.2230(10)                                                                      | 88.158(11)                                                                                    | 82.0570(10)                                                                                   |
| $\gamma$ , °                                                | 90                                                                               | 68.409(9)                                                                                     | 68.6090(10)                                                                                   |
| <i>V</i> , Å <sup>3</sup>                                   | 16410.4(10)                                                                      | 1839.8(16)                                                                                    | 1564.38(17)                                                                                   |
| <i>Z</i>                                                    | 4                                                                                | 1                                                                                             | 1                                                                                             |
| $\rho_{\text{calcd}}$ , g·cm <sup>-3</sup>                  | 1.488                                                                            | 1.718                                                                                         | 1.974                                                                                         |
| GOF on <i>F</i> <sup>2</sup>                                | 1.039                                                                            | 1.084                                                                                         | 1.105                                                                                         |
| reflns collected                                            | 45670                                                                            | 11398                                                                                         | 9792                                                                                          |
| <i>R</i> <sub>1</sub> ( <i>I</i> ≥ 2 $\sigma$ ( <i>I</i> )) | 0.0432                                                                           | 0.0393                                                                                        | 0.0445                                                                                        |
| <i>wR</i> <sub>2</sub> (all data)                           | 0.1355                                                                           | 0.1214                                                                                        | 0.1375                                                                                        |
| <i>CCDC</i>                                                 | 1432432                                                                          | 1432431                                                                                       | 1432430                                                                                       |

Table S2. Selected bond distances (Å) and angles (°) for complexes **1**, **2** and **3**.

| Complex <b>1</b> |            | Complex <b>2</b>  |            | Complex <b>3</b> |            |
|------------------|------------|-------------------|------------|------------------|------------|
| Dy(1)-O(1)       | 2.4855(72) | Dy(1)-O(1)        | 2.4935(11) | Dy(1)-O(1)       | 2.4534(4)  |
| Dy(2)-O(1)       | 2.4902(63) | Dy(2)-O(1)        | 2.4662(12) | Dy(2)-O(1)       | 2.5317(4)  |
| Dy(3)-O(1)       | 2.5056(74) |                   |            |                  |            |
| Dy(4)-O(1)       | 2.5274(66) |                   |            |                  |            |
| Average Dy-O     | 2.5024(25) | Average Dy-O      | 2.4798(5)  | Average Dy-O     | 2.4925(5)  |
| Dy(1)-Dy(2)      | 3.5689(8)  | Dy(1)-Dy(2)       | 3.4922(17) | Dy(1)-Dy(2)      | 3.5237(6)  |
| Dy(2)-Dy(3)      | 3.5648(8)  | Dy(1)-Dy(2)A      | 3.5219(19) | Dy(1)-Dy(2)A     | 3.5272(6)  |
| Dy(3)-Dy(4)      | 3.5686(8)  | Dy(1)-Dy(1)A      | 4.9870(22) | Dy(1)-Dy(1)A     | 4.9069(6)  |
| Dy(4)-Dy(1)      | 3.5657(7)  | Dy(2)-Dy(2)A      | 4.9323(23) | Dy(2)-Dy(2)A     | 5.0634(6)  |
| Average Dy-Dy    | 3.5670     | Average Dy-Dy     | 3.5077     | Average Dy-Dy    | 3.5254     |
| Dy(1)-O1-Dy(2)   | 91.658     | Dy(1)-O1-Dy(2)    | 89.514(21) | Dy(1)-O1-Dy(2)   | 89.944(12) |
| Dy(2)-O1-Dy(3)   | 91.051     | Dy(1)-O1-Dy(2)A   | 90.486(20) | Dy(1)-O1-Dy(2)A  | 90.056(12) |
| Dy(3)-O1-Dy(4)   | 90.289     |                   |            |                  |            |
| Dy(4)-O1-Dy(1)   | 90.656     |                   |            |                  |            |
| Average Dy-O-Dy  | 90.914     | Average Dy-O-Dy   | 90         | Average Dy-O-Dy  | 90         |
| Dy(1)-O1-Dy(3)   | 164.861    | Dy(1)-O1-Dy(1)A   | 180        | Dy(1)-O1-Dy(1)A  | 180        |
| Dy(2)-O1-Dy(4)   | 166.064    | Dy(2)-O1-Dy(2)A   | 180        | Dy(2)-O1-Dy(2)A  | 180        |
| symmetry code:   |            | A (1-x, 1-y, 1-z) |            | A (-x, 2-y, 1-z) |            |

Table S3. Bond valence sum calculations<sup>1</sup> for complexes **1-3** and [Dy<sub>4</sub>(μ<sub>4</sub>-OH)] reported in the literature.

| Bond       | [Dy <sub>4</sub> (μ <sub>4</sub> -OH)] <sup>ref 25</sup> |                 | Complex <b>1</b> |       | Complex <b>2</b> |       | Complex <b>3</b> |       |
|------------|----------------------------------------------------------|-----------------|------------------|-------|------------------|-------|------------------|-------|
|            | R                                                        | S <sup>a)</sup> | R                | S     | R                | S     | R                | S     |
| Dy(1)-O(1) | 2.506                                                    | 0.2736          | 2.485            | 0.289 | 2.493            | 0.283 | 2.453            | 0.315 |
| Dy(2)-O(1) | 2.500                                                    | 0.2779          | 2.490            | 0.285 | 2.466            | 0.304 | 2.531            | 0.257 |
| Dy(3)-O(1) | 2.513                                                    | 0.2687          | 2.505            | 0.274 |                  |       |                  |       |
| Dy(4)-O(1) | 2.529                                                    | 0.2578          | 2.527            | 0.259 |                  |       |                  |       |
| BVS        |                                                          | 1.078           |                  | 1.107 |                  | 1.174 |                  | 1.144 |

S = (R/R<sub>i</sub>)<sup>-N</sup>, R<sub>i</sub>=2.053 and N=6.5 for Dy<sup>3+</sup>.

Table S4. The *CSHM* values calculated by *SHAPE* 2.1 for **1** and  $[\text{Dy}_4(\mu_4\text{-OH})]$  <sup>ref25</sup>.

| Coordination Geometry                           | Complex 1 |       |       |       | $[\text{Dy}_4(\mu_4\text{-OH})]$ <sup>ref25</sup> |       |       |       |
|-------------------------------------------------|-----------|-------|-------|-------|---------------------------------------------------|-------|-------|-------|
|                                                 | Dy1       | Dy2   | Dy3   | Dy4   | Dy1                                               | Dy2   | Dy3   | Dy4   |
| Capped square antiprism J10 ( $C_{4v}$ )        | 2.004     | 1.875 | 2.123 | 1.822 | 1.920                                             | 1.951 | 1.903 | 1.966 |
| Spherical capped square antiprism ( $C_{4v}$ )  | 1.363     | 1.175 | 1.424 | 1.146 | 1.179                                             | 1.218 | 1.081 | 1.200 |
| Tricapped trigonal prism J51 ( $D_{3h}$ )       | 3.630     | 3.458 | 3.748 | 3.252 | 3.318                                             | 3.386 | 3.057 | 3.463 |
| Spherical tricapped trigonal prism ( $D_{3h}$ ) | 1.882     | 1.785 | 1.857 | 1.857 | 1.875                                             | 1.867 | 2.036 | 1.788 |

Table S5. The *CSHM* values calculated by *SHAPE* 2.1 for **2** and **3**.

| Coordination Geometry                           | Complex 2 | Complex 3 |
|-------------------------------------------------|-----------|-----------|
| Capped square antiprism J10 ( $C_{4v}$ )        | Dy1       | 1.852     |
| Spherical capped square antiprism ( $C_{4v}$ )  |           | 0.965     |
| Tricapped trigonal prism J51 ( $D_{3h}$ )       |           | 2.268     |
| Spherical tricapped trigonal prism ( $D_{3h}$ ) |           | 0.934     |
| Square antiprism ( $D_{4d}$ )                   | Dy2       | 3.076     |
| Triangular dodecahedron ( $D_{2d}$ )            |           | 2.972     |
| Biaugmented trigonal prism J50 ( $C_{2v}$ )     |           | 2.438     |
| Biaugmented trigonal prism ( $C_{2v}$ )         |           | 3.725     |

Table S6. Minimal reorientation energies ( $\text{cm}^{-1}$ ) calculated from Magellan program<sup>2</sup> for complexes **1-3**.

| Complex 1 |       | Complex 2 |       | Complex 3 |       |
|-----------|-------|-----------|-------|-----------|-------|
| Dy(1)     | 266.0 | Dy(1)     | 188.8 | Dy(1)     | 124.1 |
| Dy(2)     | 289.3 | Dy(2)     | 589.8 | Dy(2)     | 382.9 |
| Dy(3)     | 294.7 |           |       |           |       |
| Dy(4)     | 266.2 |           |       |           |       |

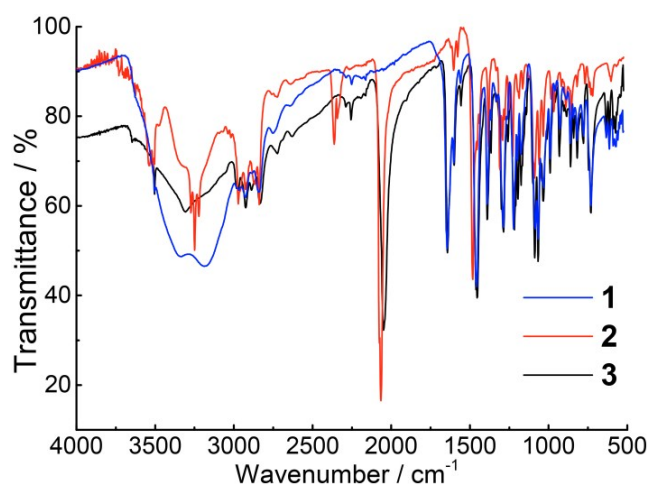

Fig. S1 IR spectra of complexes **1** (blue), **2** (red) and **3** (gray).

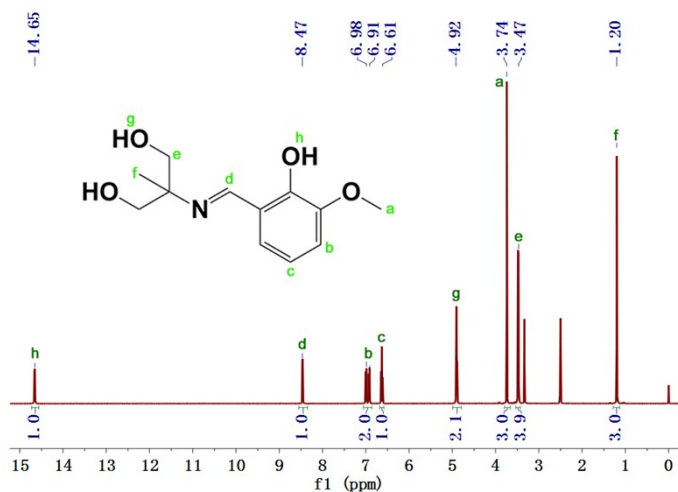

Fig. S2  $^1H$  NMR spectrum of ligand  $H_3L^1$  at 295.0 K (DMSO, 400 MHz).

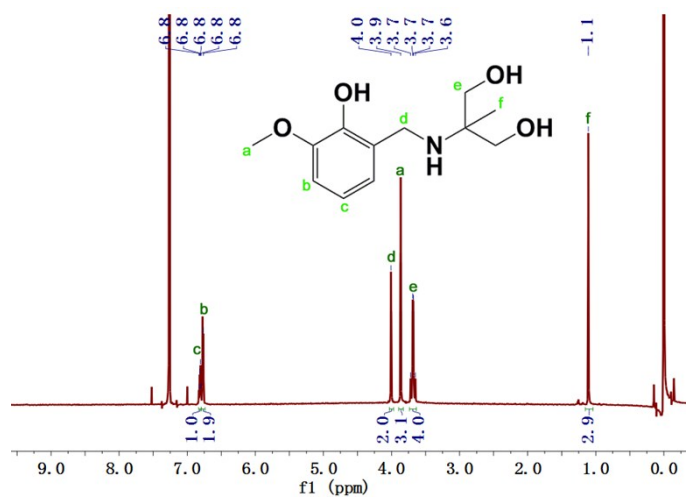

Fig. S3  $^1H$  NMR spectrum of ligand  $H_3L^2$  at 295.0 K (DCCl<sub>3</sub>, 400 MHz). The active hydrogen atoms are substituted by deuterated reagent.

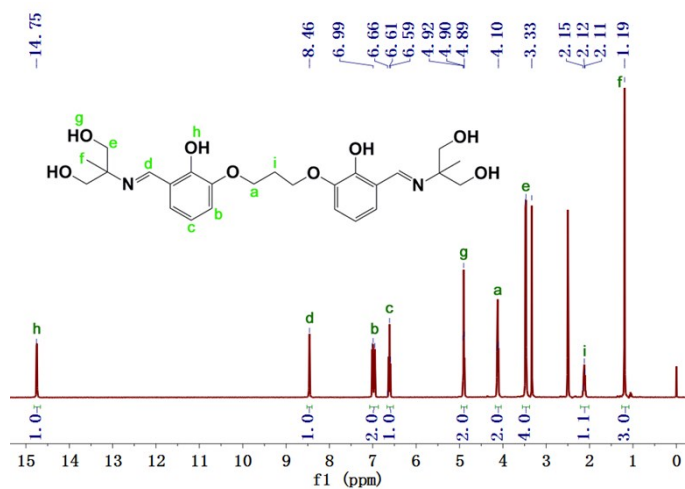

Fig. S4  $^1H$  NMR spectrum of ligand  $H_6L^3$  at 295.0 K (DMSO, 400 MHz).

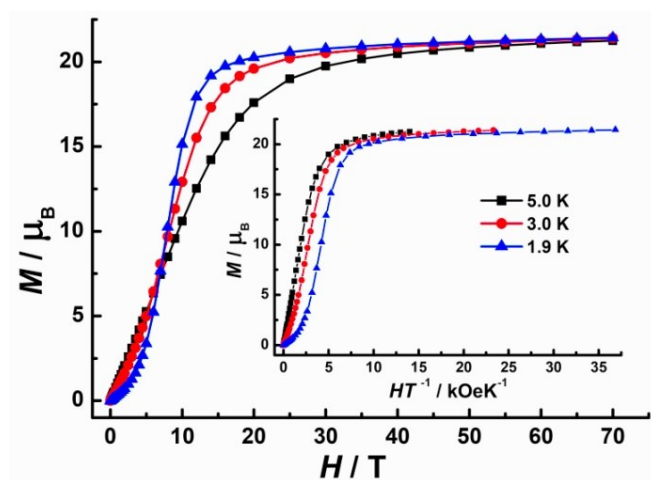

Fig. S5 Molar magnetization ( $M$ ) versus magnetic field ( $H$ ) for **1** at indicated temperature. Inset represents the plots of magnetization  $M$  versus  $H/T$ .

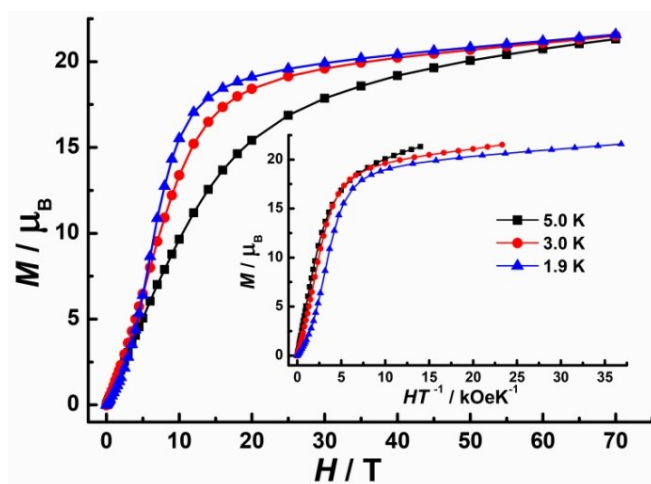

Fig. S6 Molar magnetization ( $M$ ) versus magnetic field ( $H$ ) for **2** at indicated temperature. Inset represents the plots of magnetization  $M$  versus  $H/T$ .

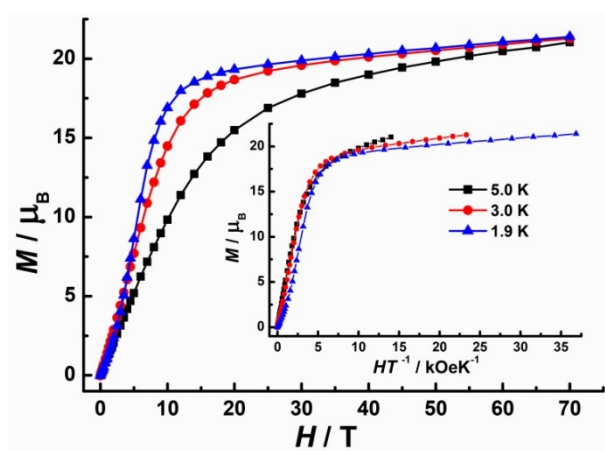

Fig. S7 Molar magnetization ( $M$ ) versus magnetic field ( $H$ ) for **3** at indicated temperature. Inset represents the plots of magnetization  $M$  versus  $H/T$ .

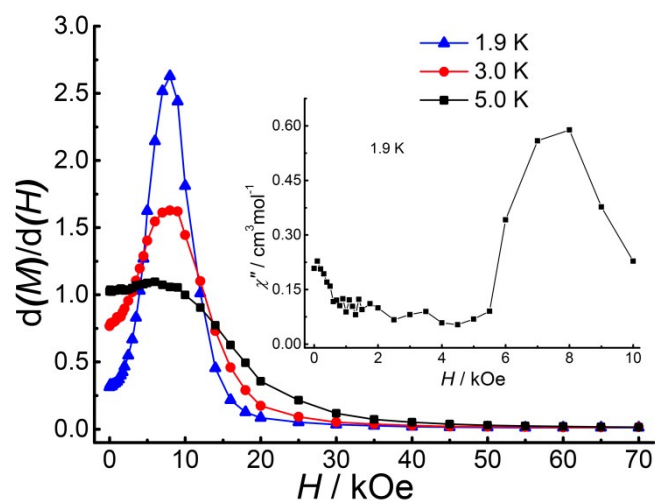

Fig. S8  $d(M/M_s)/dH$  at different temperatures for 1. Inset represents the plot of field dependent out-of-phase ( $\chi''$ ) susceptibility at 1.9 K.

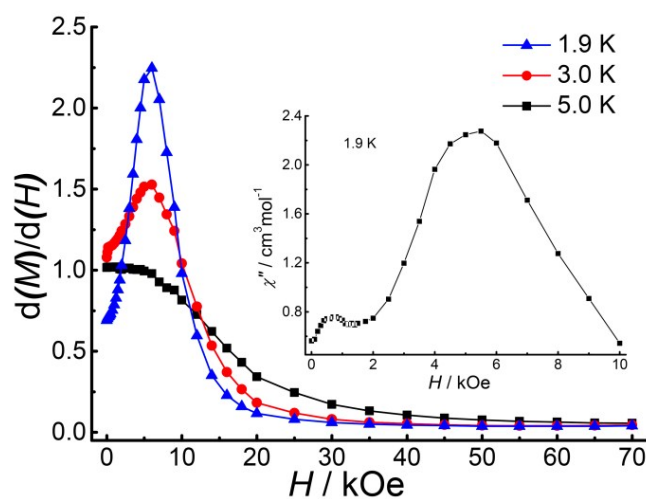

Fig. S9  $d(M/M_s)/dH$  at different temperatures for 2. Inset represents the plot of field dependent out-of-phase ( $\chi''$ ) susceptibility at 1.9 K.

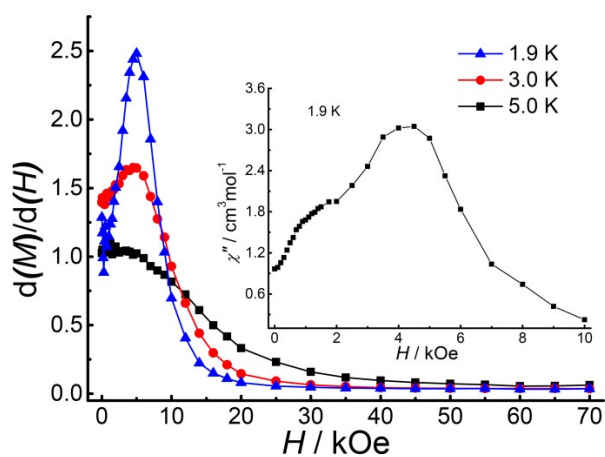

Fig. S10  $d(M/M_s)/dH$  at different temperatures for 3. Inset represents the plot of field dependent out-of-phase ( $\chi''$ ) susceptibility at 1.9 K.

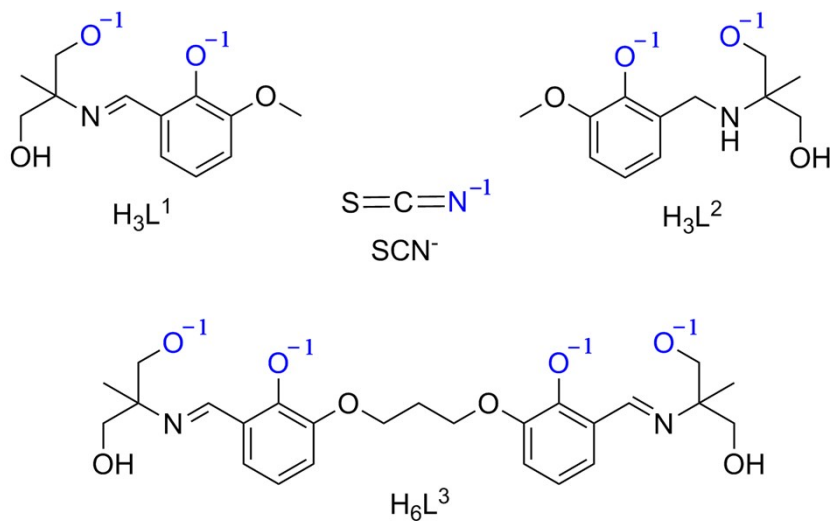

Fig. S11 Partial charges assigned to the formally charged ligands in complexes 1-3.

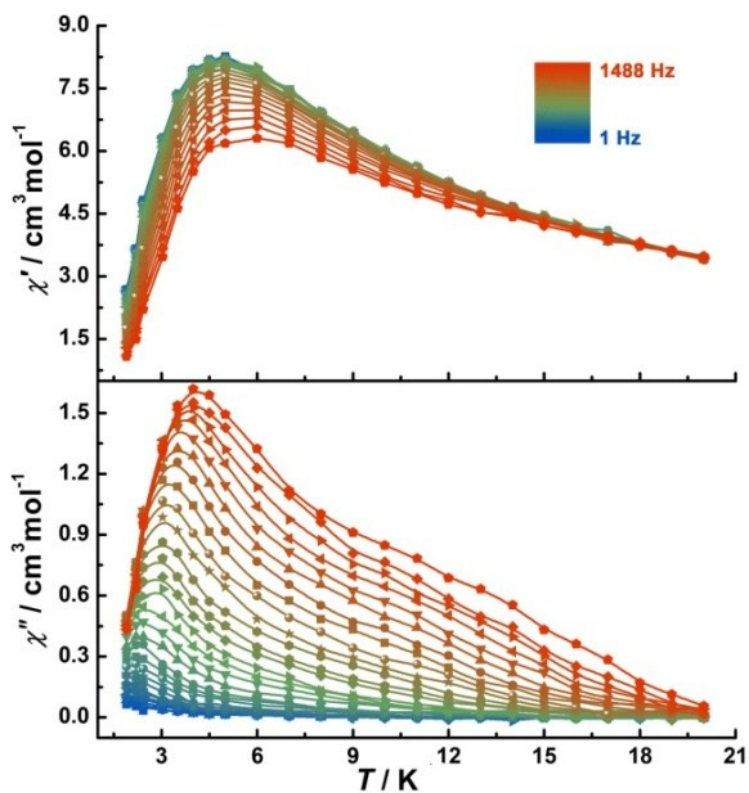

Fig. S12 Temperature dependent ac susceptibility for 1 under zero dc field.

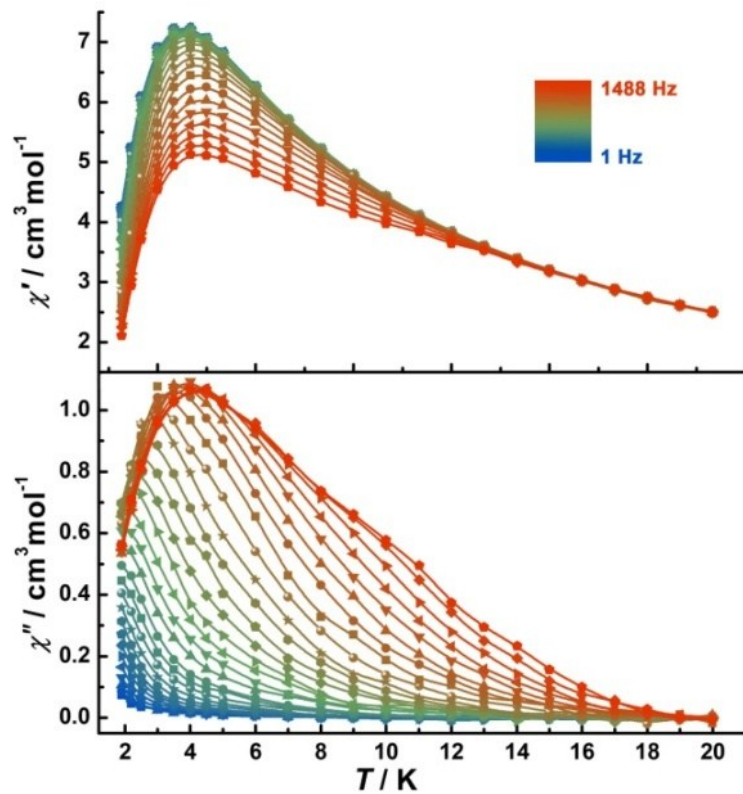

Fig. S13 Temperature dependent ac susceptibility for **2** under zero dc field.

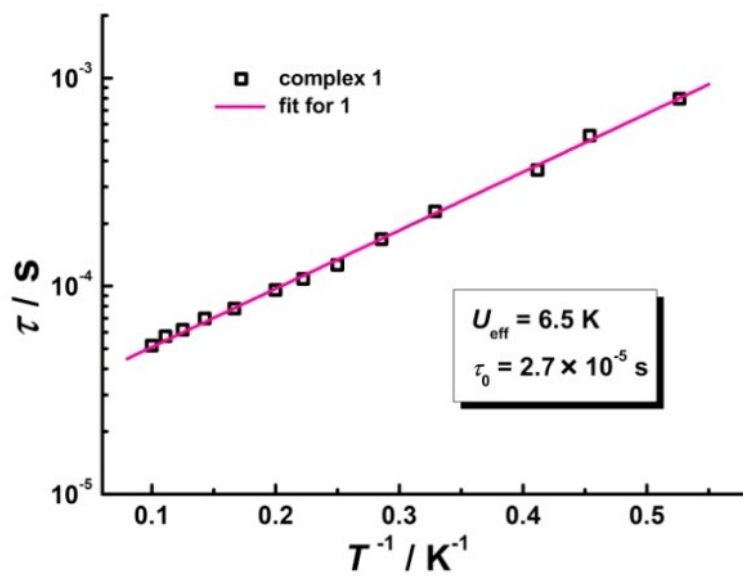

Fig. S14 Plot of  $\tau$  vs.  $T^{-1}$  for **1**. The red line represents the Arrhenius fitted result.



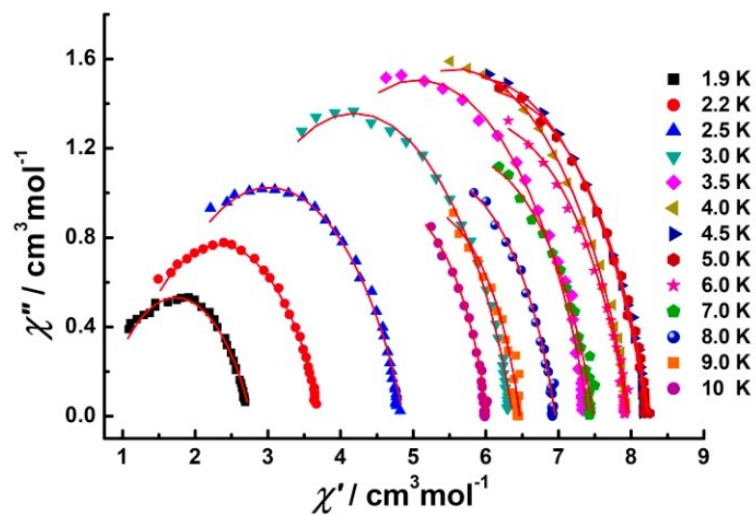

Fig. S15 Cole-Cole plots for 1 under indicated temperature. The solid lines indicate the best fits to the experiments with the generalized Debye model.

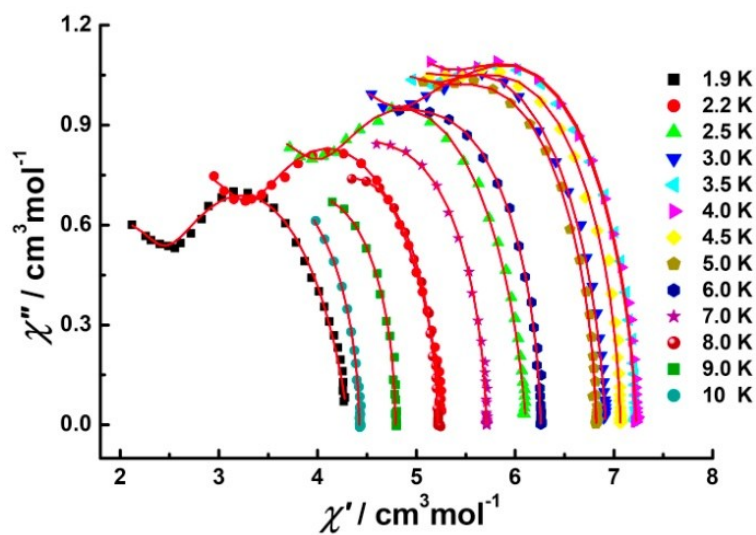

Fig. S16 Cole-Cole plots for 2 under indicated temperature. The solid lines indicate the best fits to the experiments with the double relaxation model.

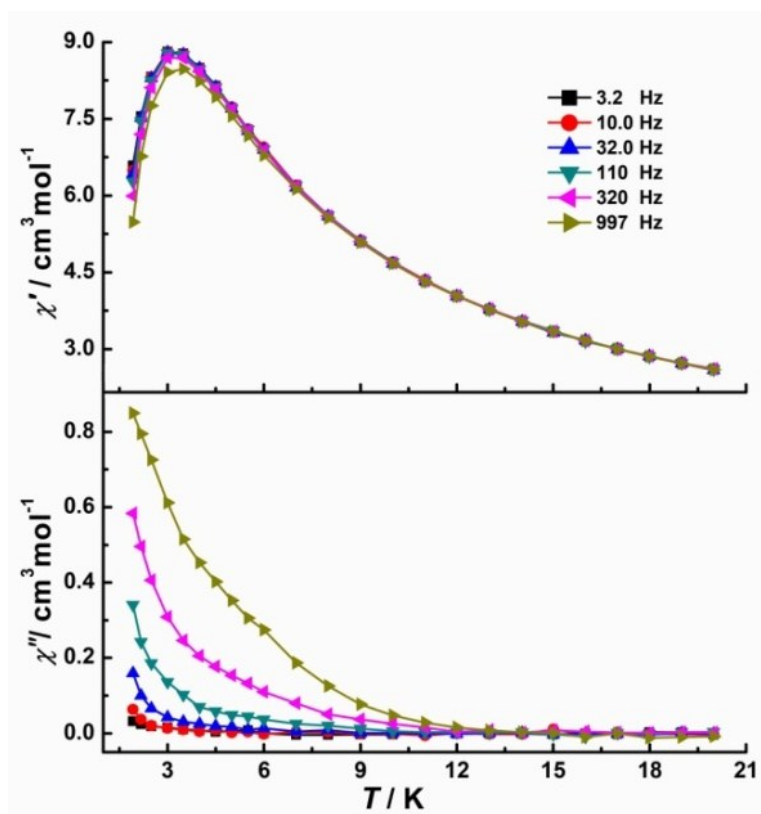

Fig. S17 Temperature-dependent ac susceptibility for **3** at indicated frequency, under zero dc field.

1. I. D. Brown and K. K. Wu, *Acta Crystallographica Section B*, 1976, B32, 1957-1959.
2. N. F. Chilton, D. Collison, E. J. L. McInnes, R. E. P. Winpenny and A. Soncini, *Nat Commun*, 2013, 4, 2551.
